# Supplementary material
Source: Springer Nature journal article supplement (https://www.springermedizin.de/resource/supplementary/13012_2006_55_MOESM2_ESM.pdf/9629148)
Supplement: MOESM2 [file 9629148]

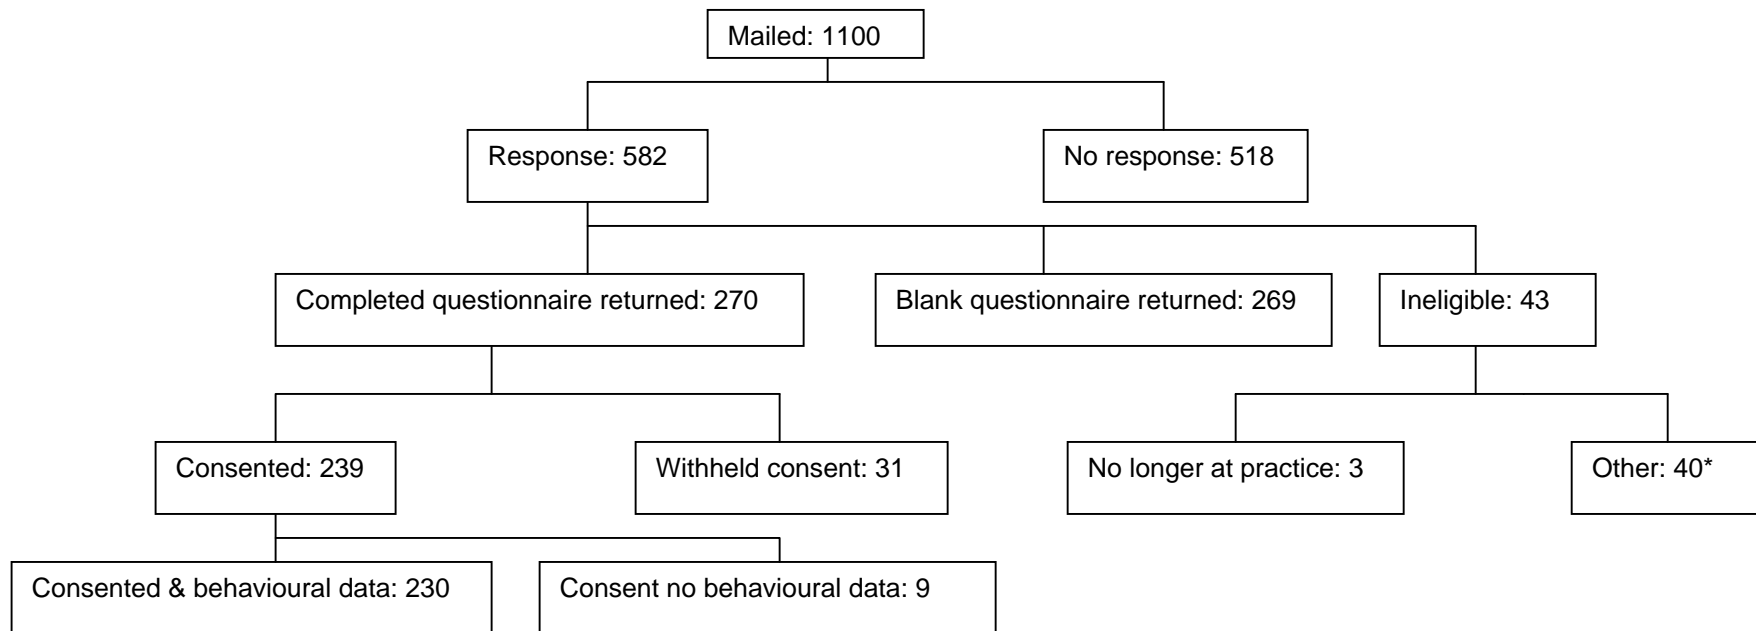

\*39 of the ineligible category were responses to an abbreviated version of the questionnaire that were not included in the analyses.
